# Supplementary material
Source: Springer Nature journal article supplement (https://www.springermedizin.de/resource/supplementary/12936_2011_1995_MOESM3_ESM.pdf/9543282)

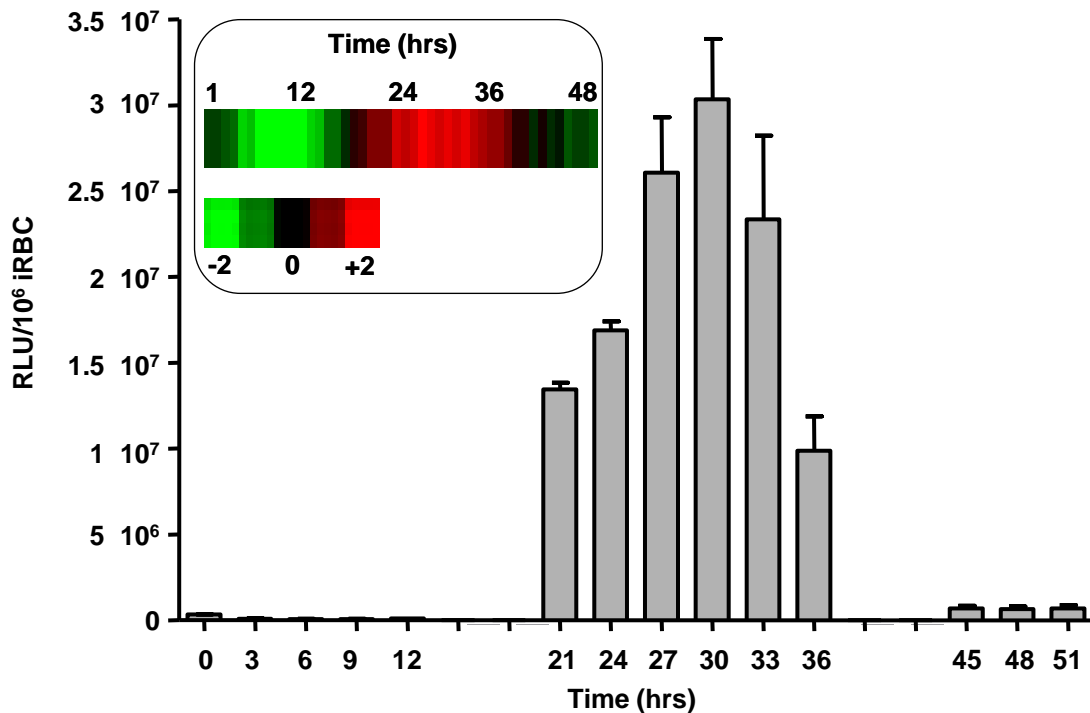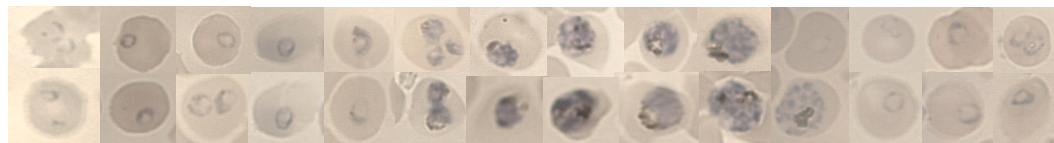

0 3 6 9 12 21 24 27 30 33 36 45 48 51

Supplement: MOESM3 [file 9543282]
